# Supplementary material for: Transperineal Laser Ablation for BPH-Related LUTS: Prospective Evaluation of Functional Outcomes and Predictors of Treatment Response
Source: Research Square preprint supplement (doi:10.21203/rs.3.rs-8427567/v1), 2026-01-13
Supplement: Supplementary file 1 [file 988e4a2a254a83896f77063b.docx]

**Supplementary table 1**. Comparison of functional outcomes in patients who completely stopped α-blocker and patients who restarted α-blocker

| **Functional Outcome** | Stopped α-blocker | Restart α-blocker | P value |
| --- | --- | --- | --- |
| **Δ** Qmax **at 3 Months** (mL/s) | +1.3 (±2.5) | +1.5 (±2.0) | 0.34 |
| **Δ** Qmax **at 6 Months** (mL/s) | +3.5 (±2.5) | +3.5 (±2.5) | 0.38 |
| **Δ** Qmax **at 12 Months** (mL/s) | +3.8 (±3.4) | +4.0 (±3.5) | 0.42 |
| **Δ** IPSS **at 3 Months** | –8.0 (±3.5) | –7.0 (±4.0) | 0.13 |
| **Δ** IPSS **at 6 Months** | –10.0 (±4.0) | –8.0 (±4.0) | 0.38 |
| **Δ** IPSS **at 12 Months** | –12.0 (±5.0) | –11.0 (±5.0) | 0.35 |
| **Δ** QoL **at 3 Months** | –1.0 (±1.0) | –1.0 (±1.0) | 0.59 |
| **Δ** QoL **at 6 Months** | –1.5 (±1.0) | –1.5 (±1.0) | 0.58 |
| **Δ** QoL **at 12 Months** | –2.0 (±1.5) | –1.5 (±1.5) | 0.23 |
| **Δ** MSHQ 3-item **at 3 Months** | +3.0 ( ±2.0) | +1.0 ( ±1.5) | 0.001 |
| **Δ** MSHQ 3-item **at 6 Months** | +3.0 (±1.5) | +1.5 (±2.0) | 0.02 |
| **Δ** MSHQ 3-item **at 12 Months** | +4.0 (±2.0) | +1.0 (±2.0) | 0.001 |
